# Supplementary material for: Doxycycline hinders phenylalanine fibril assemblies revealing a potential novel therapeutic approach in phenylketonuria
Source: PubMed Central journal article supplement (PMC4625134; doi:10.1038/srep15902), 2015-10-29
Supplement: srep15902-s1.pdf [file srep15902-s1.pdf]

## Supplementary Information

### **Doxycycline hinders phenylalanine fibril assemblies revealing a potential novel therapeutic approach in phenylketonuria.**

Ada De Luigi<sup>1</sup>, Alessandro Mariani<sup>2</sup>, Massimiliano De Paola<sup>2</sup>, Andrea Re Depaolini<sup>2</sup>, Laura Colombo<sup>1</sup>, Luca Russo<sup>1</sup>, Valeria Rondelli<sup>3</sup>, Paola Brocca<sup>3</sup>, Lihi Adler-Abramovich<sup>4</sup>, Ehud Gazit<sup>4</sup>, Elena Del Favero<sup>3</sup>, Laura Cantù<sup>3</sup> and Mario Salmona<sup>1\*</sup>.

<sup>1</sup> IRCCS-Mario Negri Institute of Pharmacological Research, Department of Biochemistry and Molecular Pharmacology, Milano, 20156, Italy, <sup>2</sup> IRCCS-Mario Negri Institute of Pharmacological Research, Department of Environmental Health Sciences, Milano, 20156, Italy, <sup>3</sup> Department of Medical Biotechnology and Translational Medicine, University of Milan, LITA, Segrate, 20090, Italy, <sup>4</sup> Department of Molecular Microbiology and Biotechnology, Tel Aviv University, Tel Aviv, 69978, Israel.

\*mario.salmona@marionegri.it

Figure S1

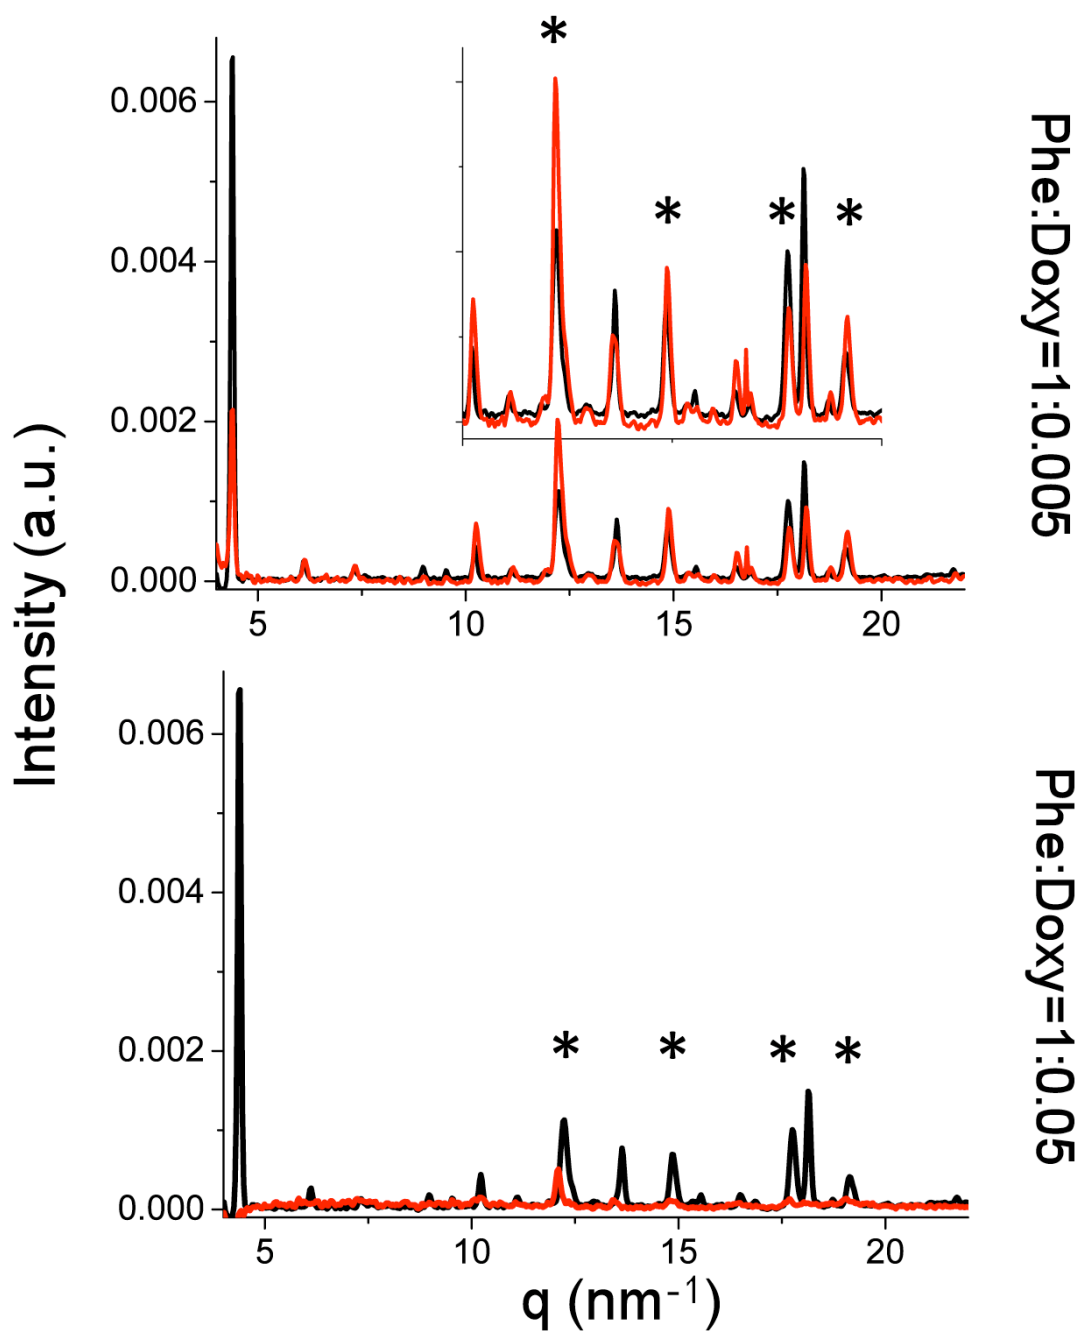

**Figure S1.** Intensity profiles in the Wide Angle X-ray Scattering region (WAXS) for mixed Phe:Doxy (red line) as compared to pure Phe (black line) for increasing Doxy relative mole ratios. Asterisks mark the equatorial peaks.

Figure S2

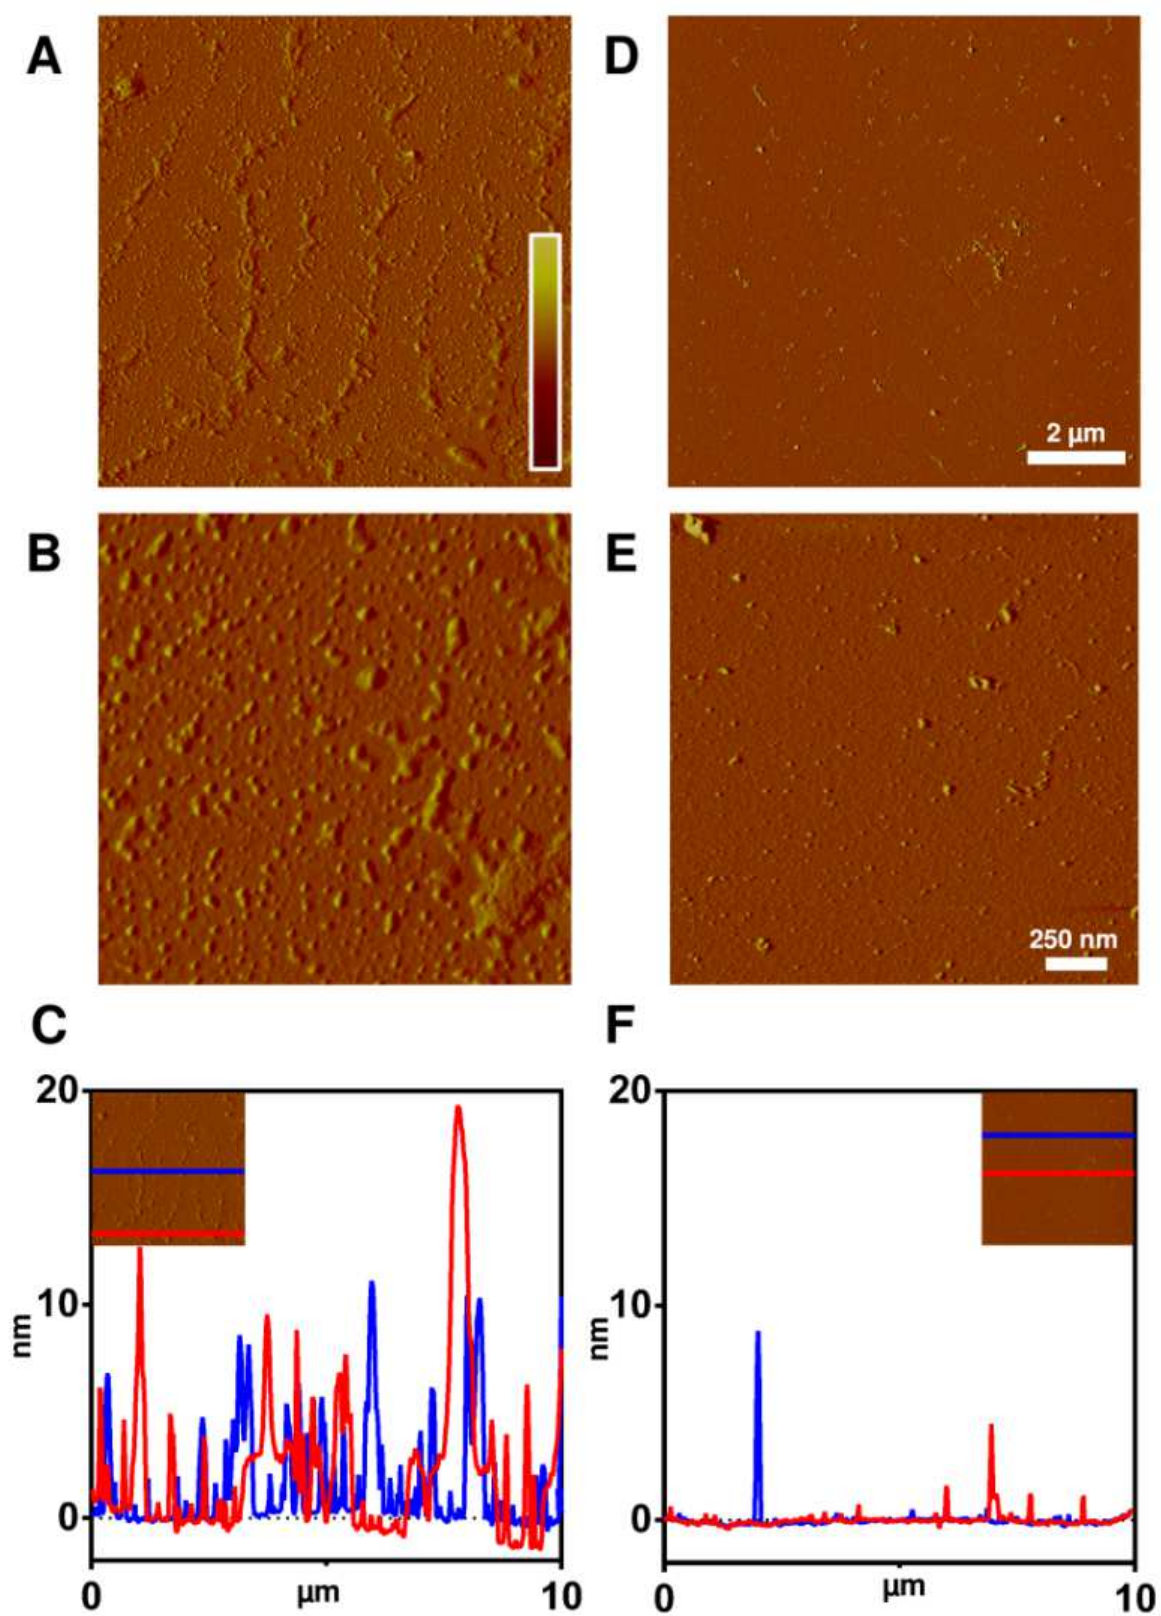

**Figure S2.** Tapping mode atomic force microscopy images (amplitude data). Images (Panels **A** and **B**) show the assemblies of freshly dissolved 1 mM Phe in 10 mM acetate buffer, pH 4.7 and following co-dissolution with Doxy (Panels **D** and **E**) at 1:0.005 molar ratio. The scale bars correspond to an amplitude range of -100/+80 mV for panel A, -25/+25 for panel B, -20/+20 for panel D and -10/+10 for panel E. Height profiles were determined by SPIP analysis and same colour code was used to represent the regions of images chosen for the measures and their line-profile. Measurement showed a mean height near 10 nm with some peaks reaching 20 nm (Panel **C**). In presence of Doxy morphologies dramatically changed, with the disappearance of bigger assemblies (Panels **D** and **E**). Measurement showed a decrease of mean height with a major distribution under 3 nm and with no peaks over 10 nm (Panel **F**).

Figure S3

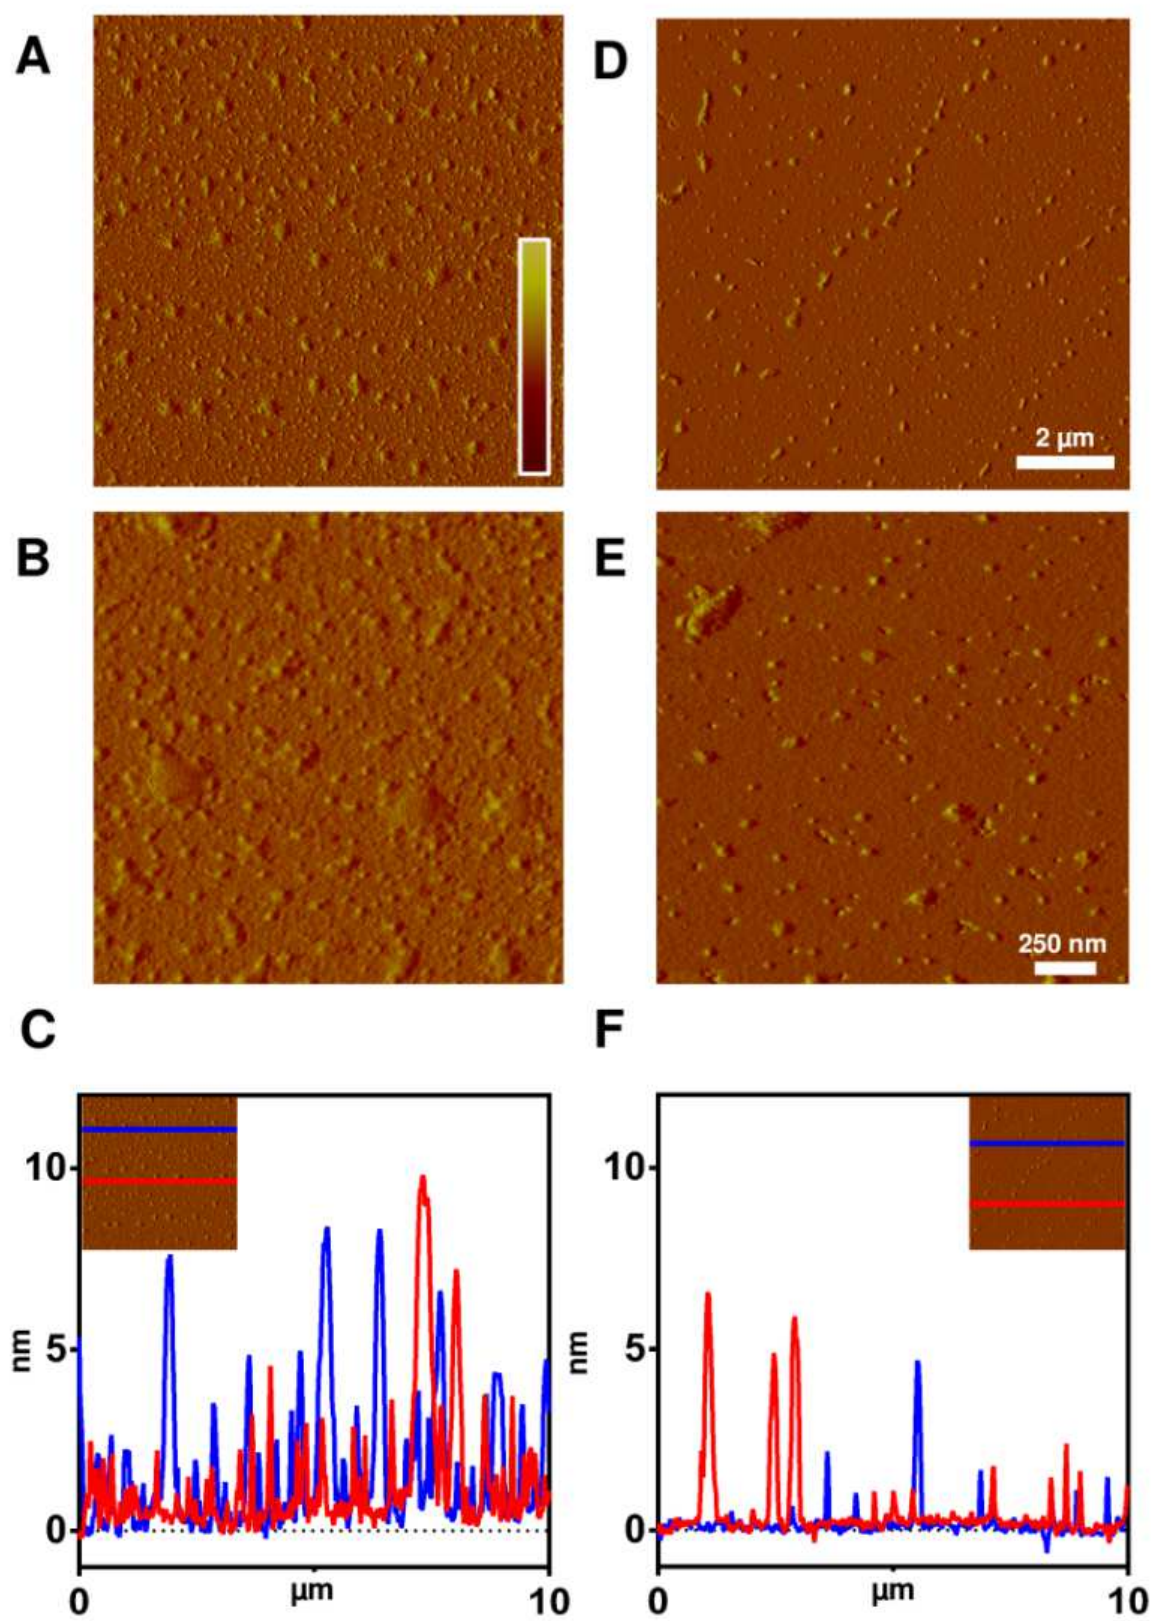

**Figure S3.** Tapping mode atomic force microscopy images (amplitude data). Images (Panels **A** and **B**) show the assemblies of freshly dissolved 1 mM Phe in 10 mM TRIS-HCl buffer, pH 9.2 and following co-dissolution with Doxy (Panels **D** and **E**) at 1:0.005 molar ratio. The scale bars correspond to an amplitude range of -50/+50 mV for panel A, -25/+20 for panel B, -45/+45 for panel D and -15/+15 for panel E. Height profiles were determined by SPIP analysis and same colour code was used to represent the regions of images chosen for the measures and their line-profile.

Sample containing Phe alone showed a complex morphology with a broad distribution between 6 nm and 10 nm for higher peaks and between 3 nm and 5 nm for the lower peaks (Panel **C**). Co-incubation with Doxy showed a reduction of heterogeneity and complexity, producing structures with height between 5 nm and 2 nm (Panel **F**).
